# Supplementary material
Source: Springer Nature journal article supplement (https://www.springermedizin.de/resource/supplementary/13048_2012_129_MOESM2_ESM.pdf/9664968)

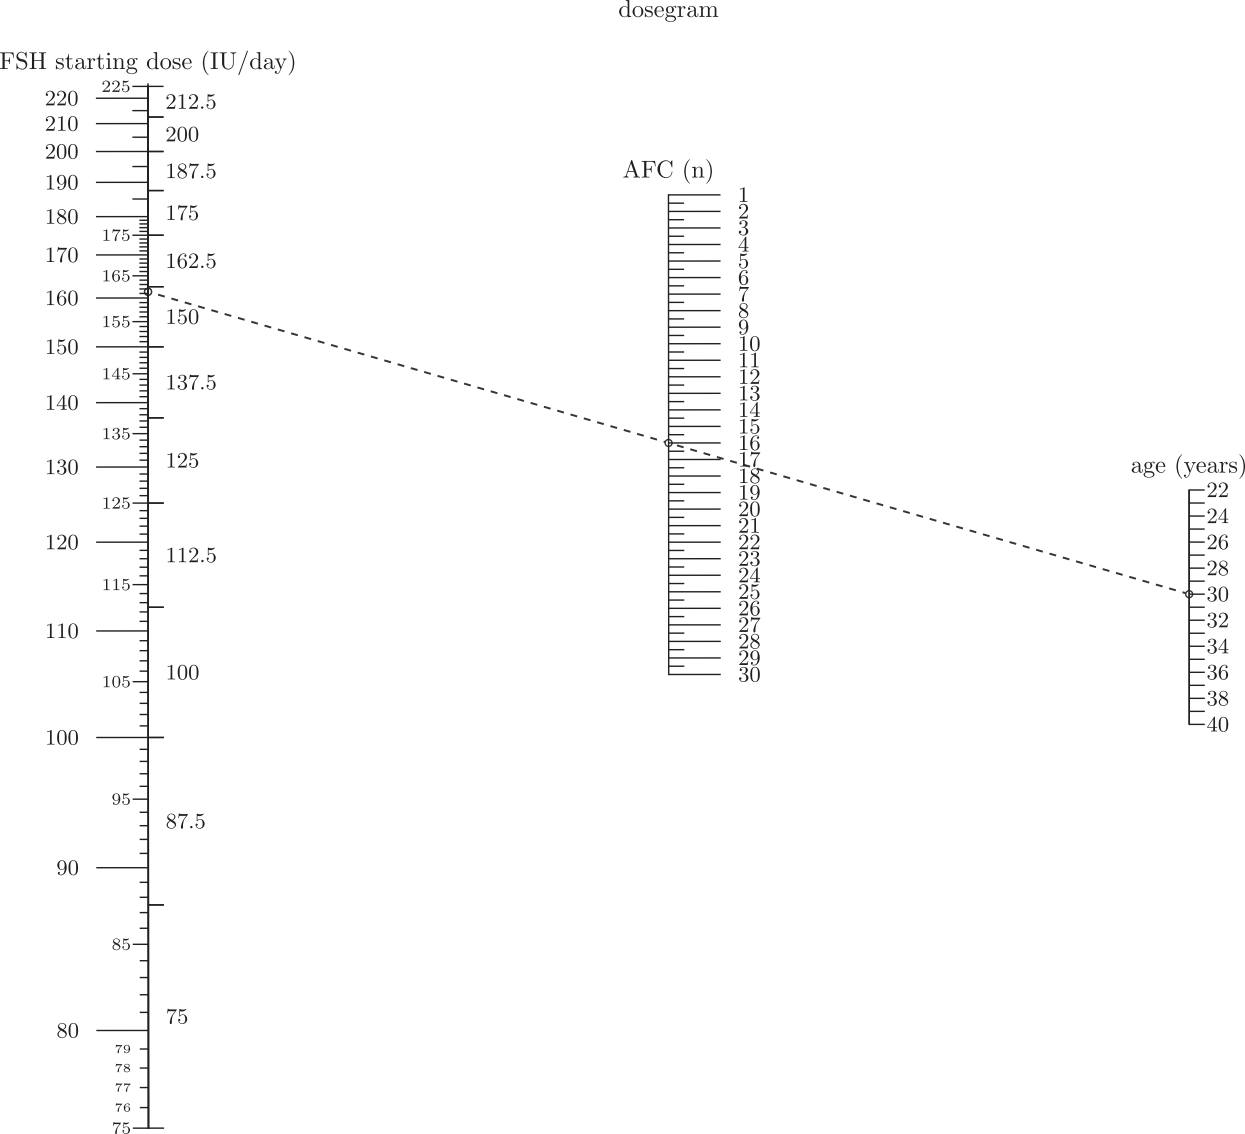

Supplement: MOESM2 [file 9664968]
